# Supplementary material for: Recycling food waste to agriculture through hydrothermal carbonization sustains food-energy-water nexus
Source: Research Square preprint supplement (doi:10.21203/rs.3.rs-3908805/v1), 2024-02-16
Supplement: Supplementary file 1 [file f9bd19da1aa2b35807cb7332.xlsx]

## Sheet: economic analysis
Table 1 The fee of construction
	Number	Rate	Sum
Area renting	667m2	1	10
Bidding service	150	0.0005	0.08
Construction management	150	0.005	0.75
Engineering supervision	150	0.005	0.75
Survey and design	150	0.006	0.9
Engineering insurance	150	0.003	0.45
Engineering consulting	5	1	5
Total			17.93
Table 2 The fee of fixed assets
	Number
Equipment	150
Construction	17.93
Basic preparation	7.4
initial working capital	30
Interest during construction	7.35
Total	212.78
Table 3 The basic financial data
Loan rate	0.049
Feedstock consumption	10t/year
Construction period	1 year
Operation period	9 year
Maintance	0.03
Labor	10 person
Salary	5/person/year
Value added tax	0.13
Income tax	0.15
Urban maintenance and construction tax	0.05
Education surtax	0.03
Table 4 The interest during project
	1st year	2nd year	3rd year	4th year	5th year	total
Financing fund						150
Interest during construction	7.35					7.35
Interest during operation		44.85	43.01	41.18	39.34	168.38
Initial loan amount	150	150	112.5	75	37.5	18.38
Period loan amount	150	112.5	75	37.5	0
Loan rate		0.25	0.25	0.25	0.25	1
Table 5 The depreciation schedule of fixed assets
Depreciation year	0	1st year	2nd year	3rd year	4th year	5th year	6th year	7th year	8th year	9th year	10th year
Equipment	150
Depreciation cost		15	15	15	15	15	15	15	15	15	15
Net value		135	120	105	90	75	60	45	30	15	0
Table 6 The amortization of intangible and deferred assets
		1st year	2nd year	3rd year	4th year	5th year	6th year	7th year	8th year	9th year	10th year
Intangible assets	20
Depreciation cost		0	1	1	1	1	1	1	1	1	1
Net value		20	19	18	17	16	15	14	13	12	11
Deferred assets	50
Depreciation cost		0	5	5	5	5	5	5	5	5	5
Net value		50	45	40	35	30	25	20	15	10	5
Total	70
Depreciation cost		0	6	6	6	6	6	6	6	6	6
Net value		70	64	58	52	46	4	34	28	22	16
Table 7 The total cost
		2nd year	3rd year	4th year	5th year	6th year	7th year	8th year	9th year	10th year	sum
Collect freight		36.5	36.5	36.5	36.5	36.5	36.5	36.5	36.5	36.5	328.5
Electricity consumption		109.5	109.5	109.5	109.5	109.5	109.5	109.5	109.5	109.5	985.5
Salary		50	50	50	50	50	50	50	50	50	450
Depreciation cost		15	15	15	15	15	15	15	15	15	135
Amortization		6	6	6	6	6	6	6	6	6	54
Maintance		15	15	15	15	15	15	15	15	15	135
Management		10	10	10	10	10	10	10	10	10	90
Interest		7.35	5.51	3.68	1.84	0	0	0	0	0	18.38
Other		10	10	10	10	10	10	10	10	10	90
Total											2286.38
Table 8 The income and tax
		2nd year	3rd year	4th year	5th year	6th year	7th year	8th year	9th year	10th year	sum
HC and AP revenue		305.9	305.9	305.9	305.9	305.9	305.9	305.9	305.9	305.9	2753.1
subsidy		109.5	109.5	109.5	109.5	109.5	109.5	109.5	109.5	109.5	985.5
Income											3738.6
Value-added tax		33.74	14.24	14.24	14.24	14.24	14.24	14.24	14.24	14.24
Income tax		37.9	37.9	37.9	37.9	37.9	37.9	37.9	37.9	37.9
Urban maintenance and construction tax		3.89	2.83	2.83	2.83	2.83	2.83	2.83	2.83	2.83
Education surtax		2.34	1.7	1.7	1.7	1.7	1.7	1.7	1.7	1.7
Tax											531.23
Table 9 The cash flow
	1st year	2nd year	3rd year	4th year	5th year	6th year	7th year	8th year	9th year	10th year
Products revenue		305.9	305.9	305.9	305.9	305.9	305.9	305.9	305.9	305.9
Subsidy		109.5	109.5	109.5	109.5	109.5	109.5	109.5	109.5	109.5
Cash inflow		415.4	415.4	415.4	415.4	415.4	415.4	415.4	415.4	415.4
Construction fee	180.78
Initial working capital	30
Operation cost		259.35	257.51	255.68	253.84	252	252	252	252	252
Salas tax		77.87	56.67	56.67	56.67	56.67	56.67	56.67	56.67	56.67
Cash outflow	212.78	337.22	314.18	312.35	318.38	316.67	316.67	324.67	324.67	324.67
Income tax		0	0	0	7.87	8	8	16	16	16
Net cash flow		78.18	101.22	103.05	97.02	98.73	98.73	90.73	90.73	90.73
Cumulative net cash flow		-134.6	-33.38	69.67	166.69	265.42	364.15	454.88	545.61	636.34
Net cash flow after income tax		78.18	101.22	103.05	89.15	90.73	90.73	74.73	74.73	74.73
Cumulative net cash flow after income tax		-134.6	-33.38	69.67	158.82	257.42	356.15	438.88	529.61	620.34
Payback peroid			3.5 year

## Sheet: carbon emission of HTC 
Table 10 Equivalent carbon emission during HTC of 1 ton food waste with agriculture application of the products
Category	Number	Emission factor (kg CO2/kWh)/(kg CO2/kg)	Carbon emission(t CO2e/t FW)
Production emission			0.01
Electricity consumption (kWh/t)	300	1.13	0.339
N fertilizer displacement (kg)	4.2(AP)+3(HC)	7.76	0.056
P fertilizer displacement(kg)	0.4(AP)+1.4(HC)	2.33	0.004
K fertilizer displacement(kg)	1.6(AP)+0.3(HC)	0.66	0.001
Soil GHGs reduction			0.279
Soil carbon sequestration			0.537
Table 11 Soil carbon sequestration during HTC of 1 ton food waste with agriculture application of the products
Soil carbon sequestration	The increase of soil organic carbon compared to control (kg/t)	Soil bulk density (kg/m3)	Soil hight (m)	1 ton HTC products of food waste applicated in area (m2)	(t CO2e/t FW)
HC	2.5	1400	0.2	71	0.182233
AP	0.48	1400	0.2	720	0.354816
Table 12 Greenhouse gas emission during HTC of 1 ton food waste with agriculture application of the products
Soil GHGs reduction	The reduction of GHG emission compared to control (kg/ha)	1 ton HTC products of FW applicated in area (m2)	GHG reduction for 1 ton FW HTC products (kg CO2/t)	CO2e (t CO2/t)
N2O (HC)	0.511	71	0.004	0.00106
N2O (AP)	1.7	720	0.12	0.0318
CH4 (HC)	1.122	71	0.008	0.000224
CH4 (AP)	1.05	720	0.07	0.00196
CO2 (HC)	999	71	7.1	0.0071
CO2 (AP)	3342	720	237	0.237

## Sheet: GHGs emission
Table 13 Greenhouse gas emission flux during topdressing stage of different treatments
Emission flux (mg/m2/hr)	2023/7/9 Sowing	2023/7/26 Jointing	2023/8/13 Flared	2023/8/29 Heading	2023/9/10 Milk
N2O
CK-1	335 ± 61a	323 ± 73a	110 ± 43a	83 ± 27a	40 ± 8a
HC	286 ± 9a	273 ± 33a	97 ± 47a	83 ± 29a	34 ± 9a
CF	319 ± 33a	380 ± 44a	199 ± 58a	127 ± 40a	54 ± 6a
AP	227 ± 45b	252 ± 78a	112 ± 47a	50 ± 15b	27 ± 13b
CH4
CK-1	-0.06 ± 0.014a	0.05 ± 0.030a	0.09 ± 0.032a	-0.13 ± 0.037a	-0.16 ± 0.034a
HC	-0.16 ± 0.024a	-0.04 ± 0.041b	0.01 ± 0.045a	-0.13 ± 0.033a	-0.16 ± 0.038a
CF	-0.22 ± 0.020a	-0.15 ± 0.019a	-0.01 ± 0.009a	-0.06 ± 0.010a	-0.06 ± 0.007a
AP	-0.26 ± 0.084a	-0.25 ± 0.091a	-0.08 ± 0.052a	-0.09 ± 0.064a	-0.07 ± 0.035a
CO2
CK-1	562 ± 27a	734 ± 25a	497 ± 24a	341 ± 55a	156 ± 53a
HC	578 ± 33a	760 ± 51a	406 ± 83a	201 ± 80a	106 ± 38a
CF	435 ± 41a	763 ± 74a	503 ± 38a	282 ± 49a	182 ± 64a
AP	302 ± 56b	506 ± 92b	301 ± 44b	154 ± 16b	117 ± 17a
Table 14 Cumulative greenhouse gas emission during topdressing stage of different treatments
Cumulative emission (kg/ha)	2023/7/9 Sowing	2023/7/26 Jointing	2023/8/13 Flared	2023/8/29 Heading	2023/9/10 Milk	Total	Detal
N2O
CK-1	1.37 ± 0.25a	1.40 ± 0.32a	0.43 ± 0.17a	0.24 ± 0.08a	0.34 ± 0.07a	3.77 ± 0.88a	0.51088
HC	1.17 ± 0.04a	1.18 ± 0.14a	0.38 ± 0.19a	0.24 ± 0.08a	0.29 ± 0.08a	3.26 ± 0.52a
AP	0.93 ± 0.18a	1.09 ± 0.34a	0.43 ± 0.18a	0.15 ± 0.04a	0.23 ± 0.11a	2.83 ± 0.85a	1.70781
CF	1.30 ± 0.13b	1.65 ± 0.19a	0.77 ± 0.22a	0.37 ± 0.12b	0.46 ± 0.05b	4.54 ± 0.71a
Cumulative emission (kg/ha)
CH4
CK-1	-0.27 ± 0.06a	0.21 ± 0.13a	0.35 ± 0.12a	-0.37 ± 0.11a	-1.34 ± 0.28a	-1.42 ± 0.70a	1.11
HC	-0.66 ± 0.10a	-0.19 ± 0.18b	0.06 ± 0.17a	-0.39 ± 0.09a	-1.35 ± 0.32a	-2.53 ± 0.86a
AP	-1.07 ± 0.34a	-1.09 ± 0.39a	-0.32 ± 0.20a	-0.26 ± 0.18a	-0.65 ± 0.30a	-3.39 ± 1.42a	1.05
CF	-0.91 ± 0.08a	-0.66 ± 0.08a	-0.06 ± 0.03a	-0.19 ± 0.03a	-0.5 ± 0.06a	-2.32 ± 0.28a
Cumulative emission (kg/ha)
CO2
CK-1	2295.75 ± 110.43a	3173.82 ± 110.12a	1912.02 ± 91.01a	984.96 ± 157.13a	1314.84 ± 442.84a	9681.38 ± 911.54a	998.99
HC	2358.69 ± 135.14a	3286.71 ± 218.72a	1560.24 ± 316.87a	580.67 ± 231.46a	896.08 ± 321.48a	8682.39 ± 1223.67a
AP	1235.97 ± 227.05a	2189.32 ± 397.40a	1158.18 ± 169.64a	445.14 ± 45.93a	984.74 ± 143.04a	6013.35 ± 983.07a	3342.14
CF	1776.77 ± 165.34b	3299.34 ± 321.45b	1933.24 ± 147.74b	814.09 ± 141.42b	1532.05 ± 539.43a	9355.48 ± 1315.39b
